# Supplementary material
Source: MDPI journal article supplement (https://www.mdpi.com/2073-4352/12/2/262)
Supplement: s1 [file s1]

## Article

# Straightforward One-pot Synthesis of New 4-Phenyl-1,2,5,6-tetraazafluoranthene-3(2H)-one Derivatives: X-Ray Single Crystal Structure and Hirshfeld Analyses

Ahmed T. A. Boraei<sup>1,\*</sup>, Matti Haukka<sup>2</sup>, Manar Sopaih<sup>1</sup>, Abdullah Mohammed Al-Majid<sup>3</sup>, Saied M. Soliman<sup>4</sup>, Assem Barakat<sup>3,\*</sup>, and Ahmed A. M. Sarhan<sup>5</sup>

<sup>1</sup> Chemistry Department, Faculty of Science, Suez Canal University, Ismailia 41522, Egypt. mnrsopaih@yahoo.com (M.S).

<sup>2</sup> Department of Chemistry, University of Jyväskylä, P.O. Box 35, FI-40014 Jyväskylä, Finland. matti.o.haukka@jyu.fi (M.H.).

<sup>3</sup> Department of Chemistry, College of Science, King Saud University, P. O. Box 2455, Riyadh 11451, Saudi Arabia. amajid@ksu.edu.sa (A.M.A.).

<sup>4</sup> Department of Chemistry, Faculty of Science, Alexandria University, P.O. Box 426, Ibrahimia, Alexandria 21321, Egypt; saied1soliman@yahoo.com or saeed.soliman@alexu.edu.eg (S.M.S.)

<sup>5</sup> Chemistry Department, Faculty of Science, Arish University, Al-Arish 45511, Egypt; as-arhan@aru.edu.eg (A.A.M.S.).

\* Correspondence: Emails: ahmed\_tawfeek83@yahoo.com, ahmed\_boraei@science.suez.edu.eg (A.T.A.B.); ambarakat@ksu.edu.sa; Tel.: +966-11467-5901(A.B.); Fax: +966-11467-5992 (A.B.).

## Supporting Materials

### X-Ray structure determinations

The crystal of nd29 and nd5 were immersed in cryo-oil, mounted in a loop, and measured at a temperature of 120 K. The X-ray diffraction data was collected on a Rigaku Oxford Diffraction Supernova diffractometer using Cu K $\alpha$  radiation. The *CrysAlisPro*<sup>1</sup> software package was used for cell refinement and data reduction. An analytical or multi-scan absorption correction (*CrysAlisPro*<sup>1</sup>) was applied to the intensities before structure solution for nd29 and nd5 respectively. Structures were solved by intrinsic phasing (*SHELXT*<sup>2</sup>) method. Structural refinements were carried out using *SHELXL*<sup>3</sup> software with *SHELXLE*<sup>4</sup> graphical user interface. The NH hydrogen atom was located from the difference Fourier map and refined isotropically. All other hydrogen atoms were positioned geometrically and constrained to ride on their parent atoms, with C-H = 0.95 – 0.99 Å and U<sub>iso</sub> = 1.2–1.5·U<sub>eq</sub>(parent atom).

**Citation:** Lastname, F.; Lastname, F.; Lastname, F. Title. *Crystals* **2022**, *12*, 262.

<https://doi.org/10.3390/cryst12020262>

Academic Editor: Firstname Last-name

Received: 29 January 2022

Accepted: 11 February 2022

Published: 15 February 2022

**Publisher's Note:** MDPI stays neutral with regard to jurisdictional claims in published maps and institutional affiliations.

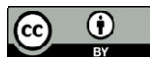

**Copyright:** © 2022 by the authors. Submitted for possible open access publication under the terms and conditions of the Creative Commons Attribution (CC BY) license (<https://creativecommons.org/licenses/by/4.0/>).

## References

1. Rikagu Oxford Diffraction, *CrysAlisPro*, Agilent Technologies inc., 2020, Yarnton, Oxfordshire, England.
2. Sheldrick, G. M. SHELXT-Integrated Space-Group and Crystal-Structure Determination. *Acta Cryst. A* **2015**, *A71*, 3-8.
3. Sheldrick, G. M. Crystal Structure Refinement with SHELXL. *Acta Cryst.C* **2015**, *C71*, 3-8.
4. Hübschle, C. B.; Sheldrick, G. M.; Dittrich, B. *ShelXle*: a Qt graphical user interface for SHELXL. *J. Appl. Cryst.* **2011**, *44*, 1281-1284.

## NMR Spectra

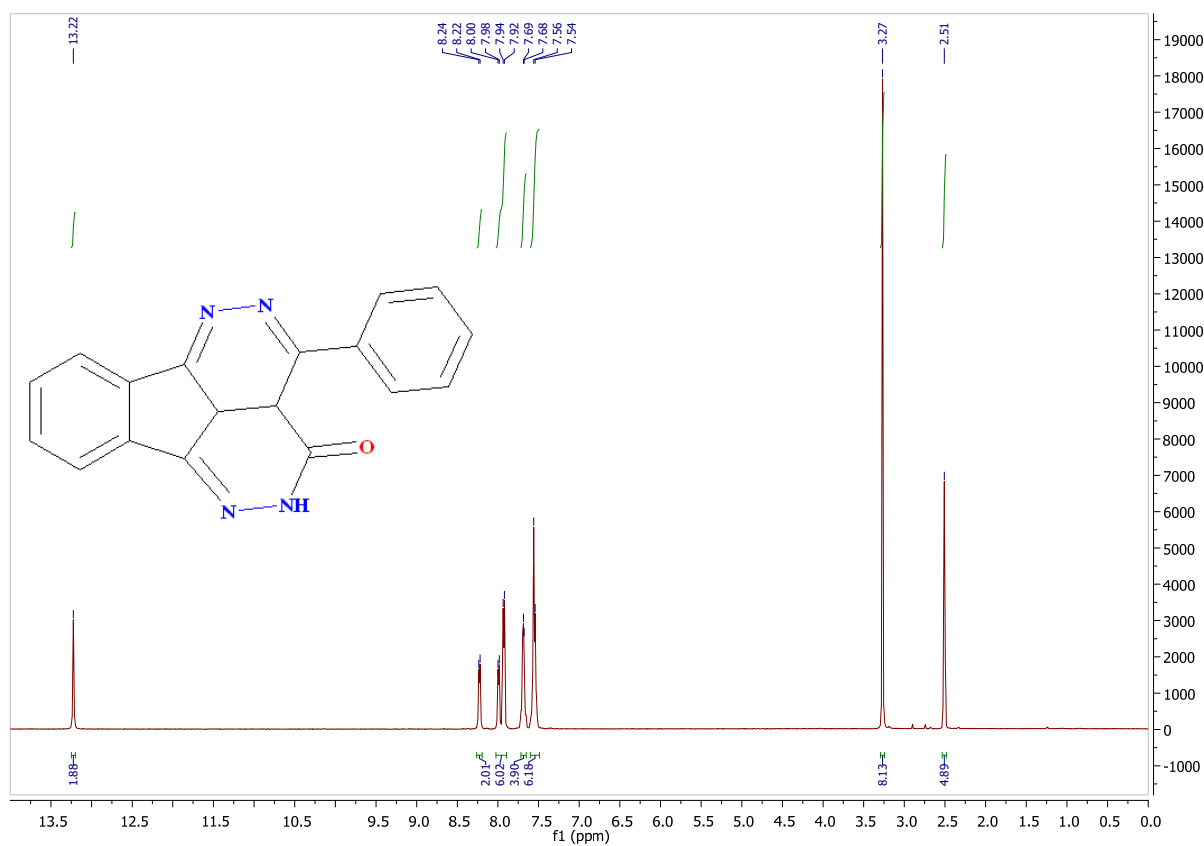

Figure S1. <sup>1</sup>H NMR of 2

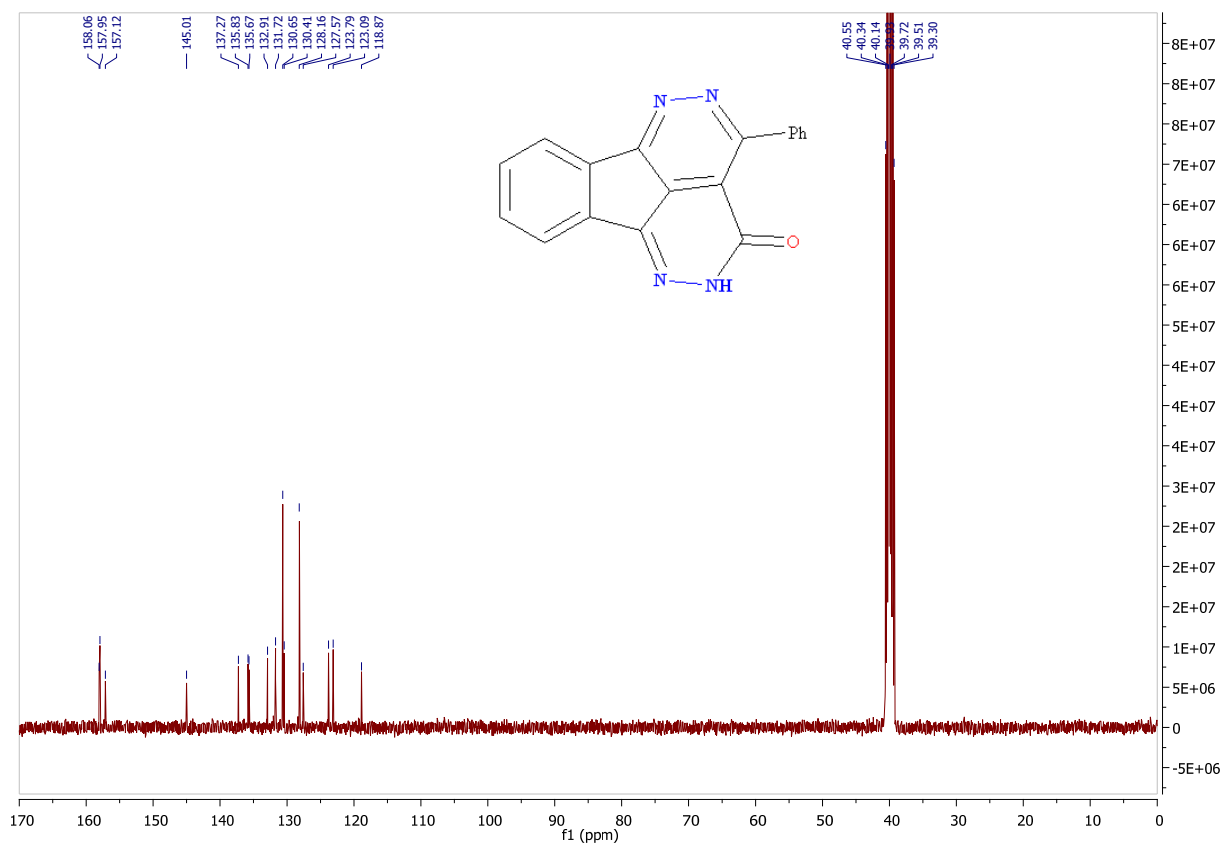Figure S2. <sup>13</sup>C NMR of 2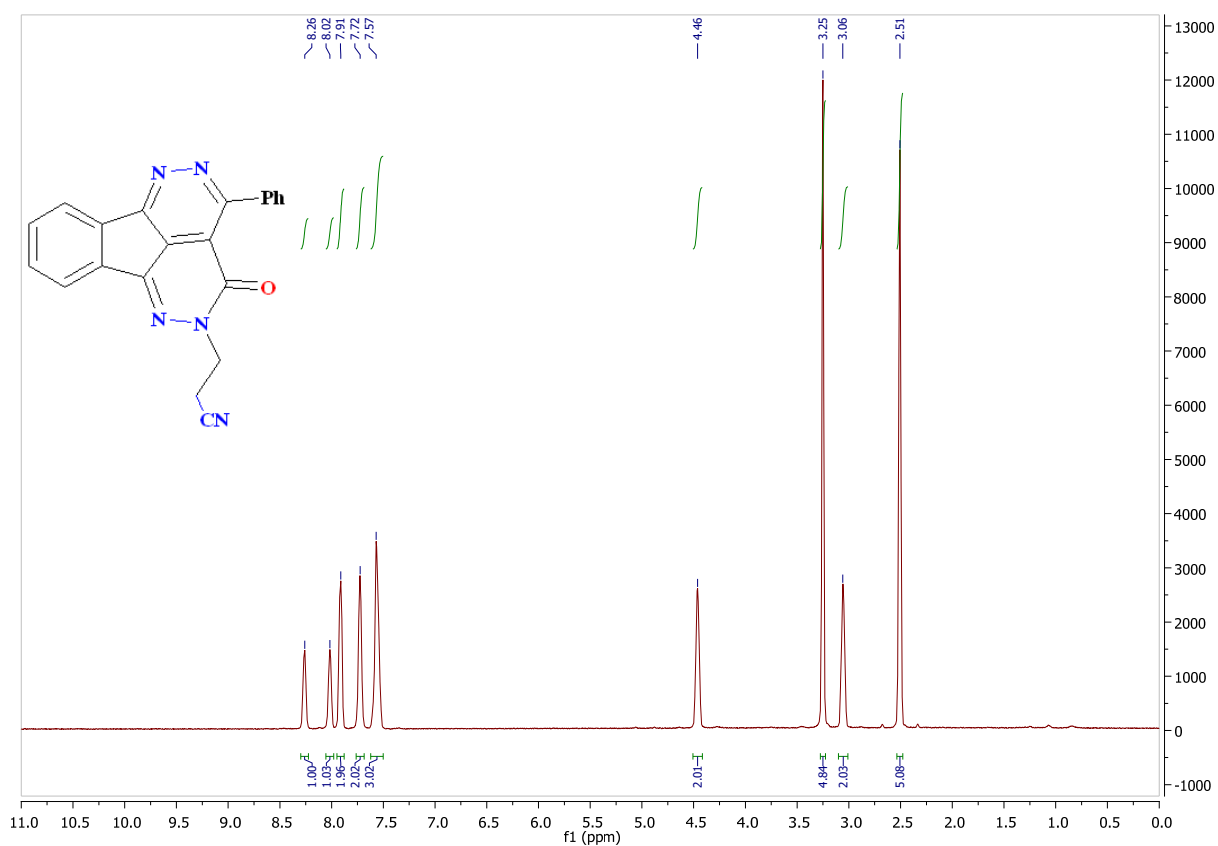Figure S3. <sup>1</sup>H NMR of 3

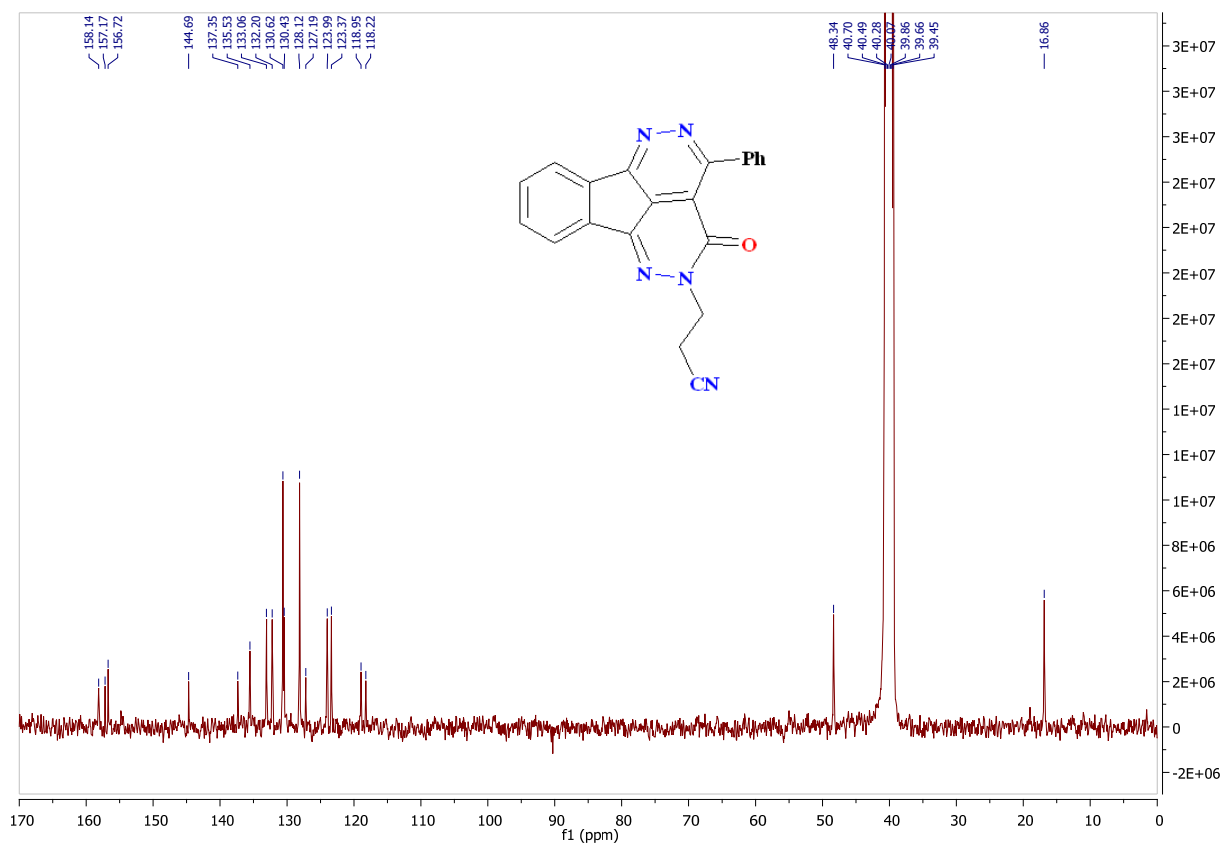Figure S4. <sup>13</sup>C NMR of 3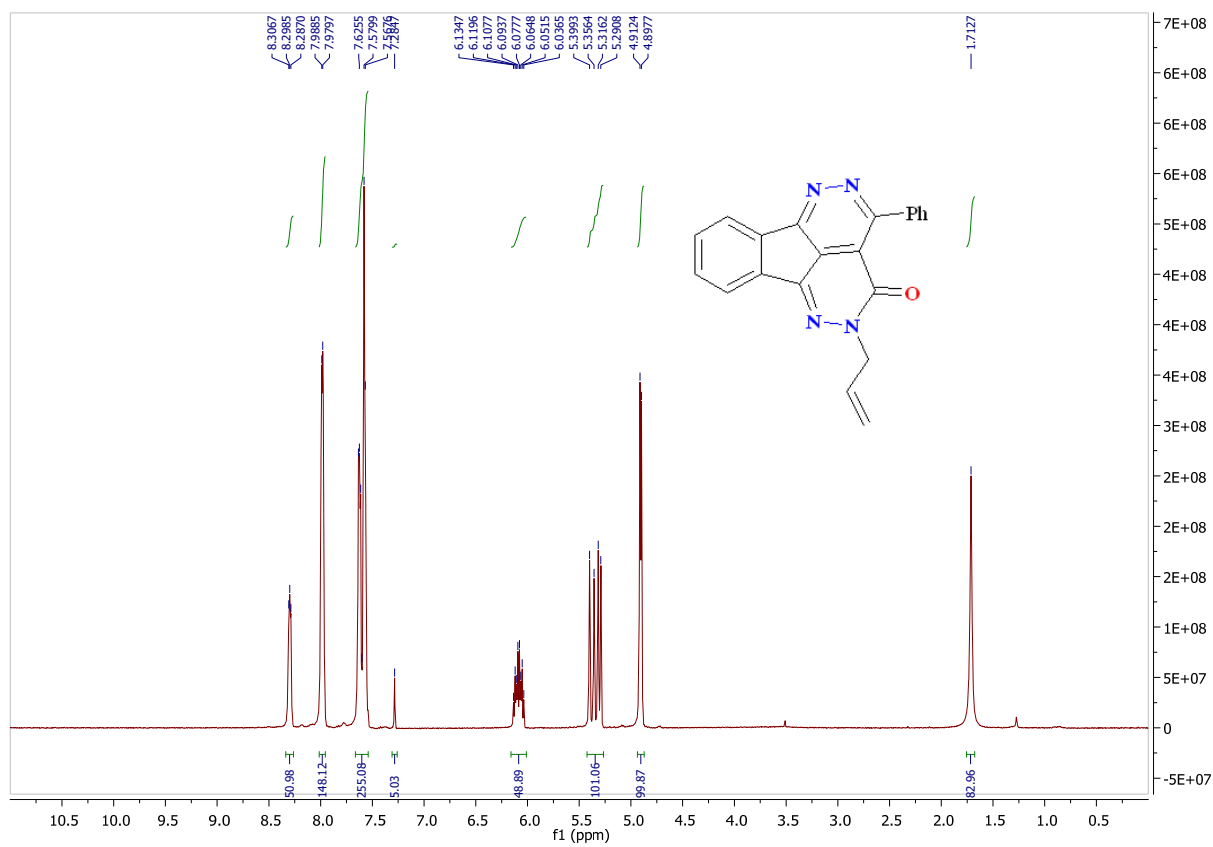Figure S5. <sup>1</sup>H NMR of 4

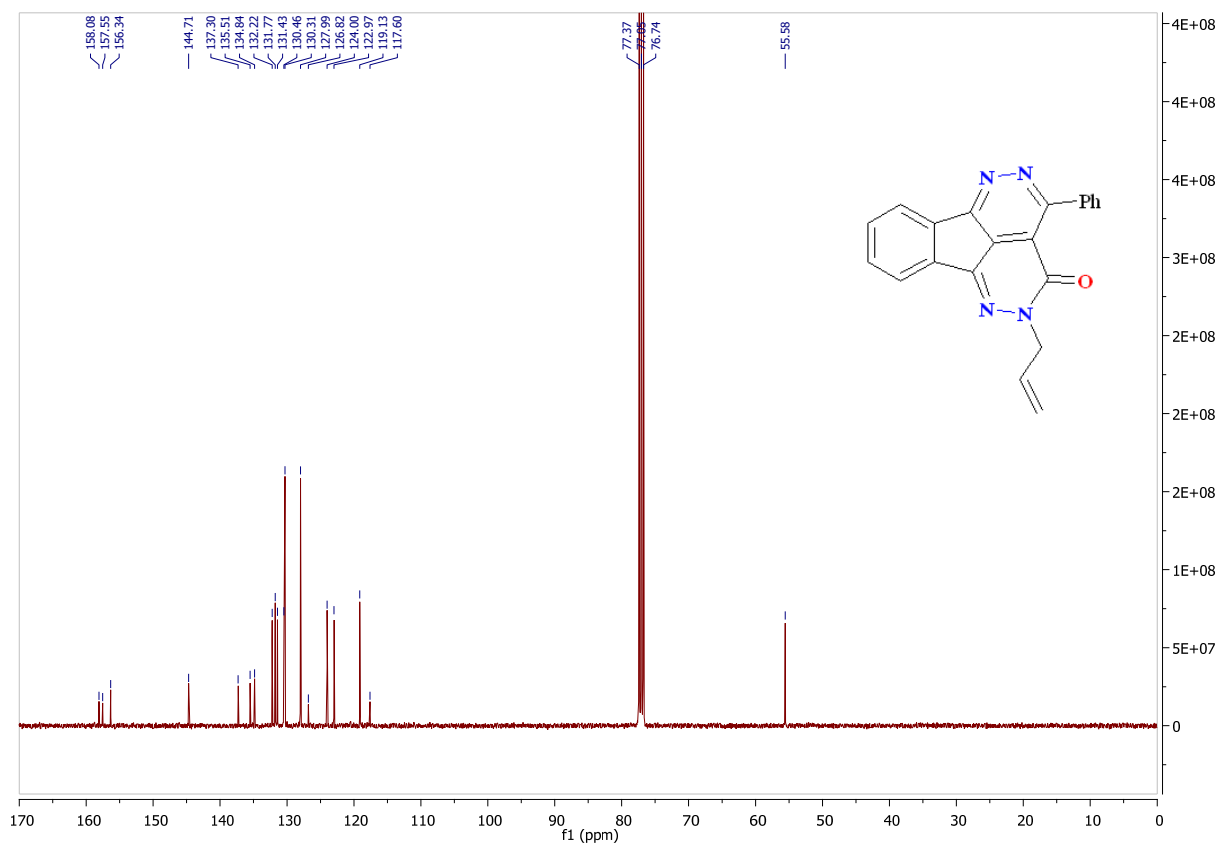Figure S6. <sup>13</sup>C NMR of 4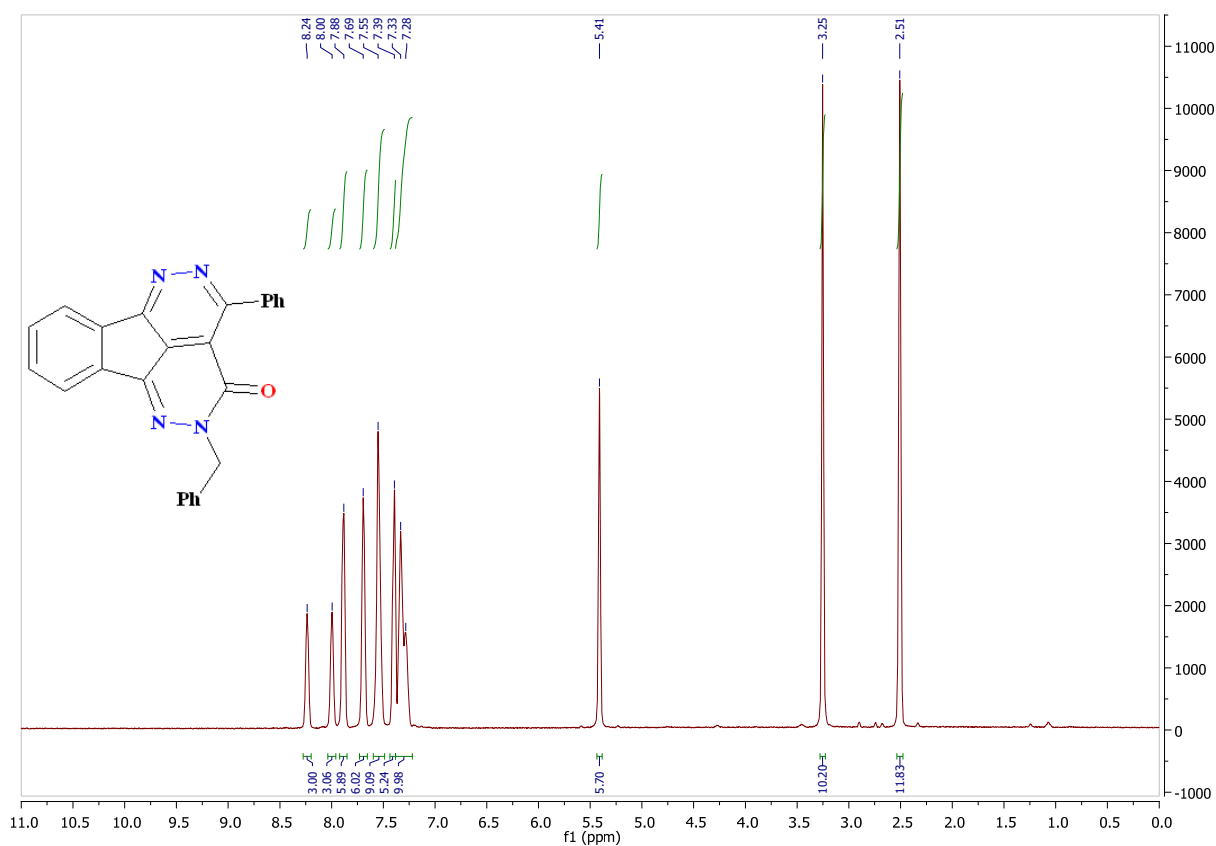Figure S7. <sup>1</sup>H NMR of 5

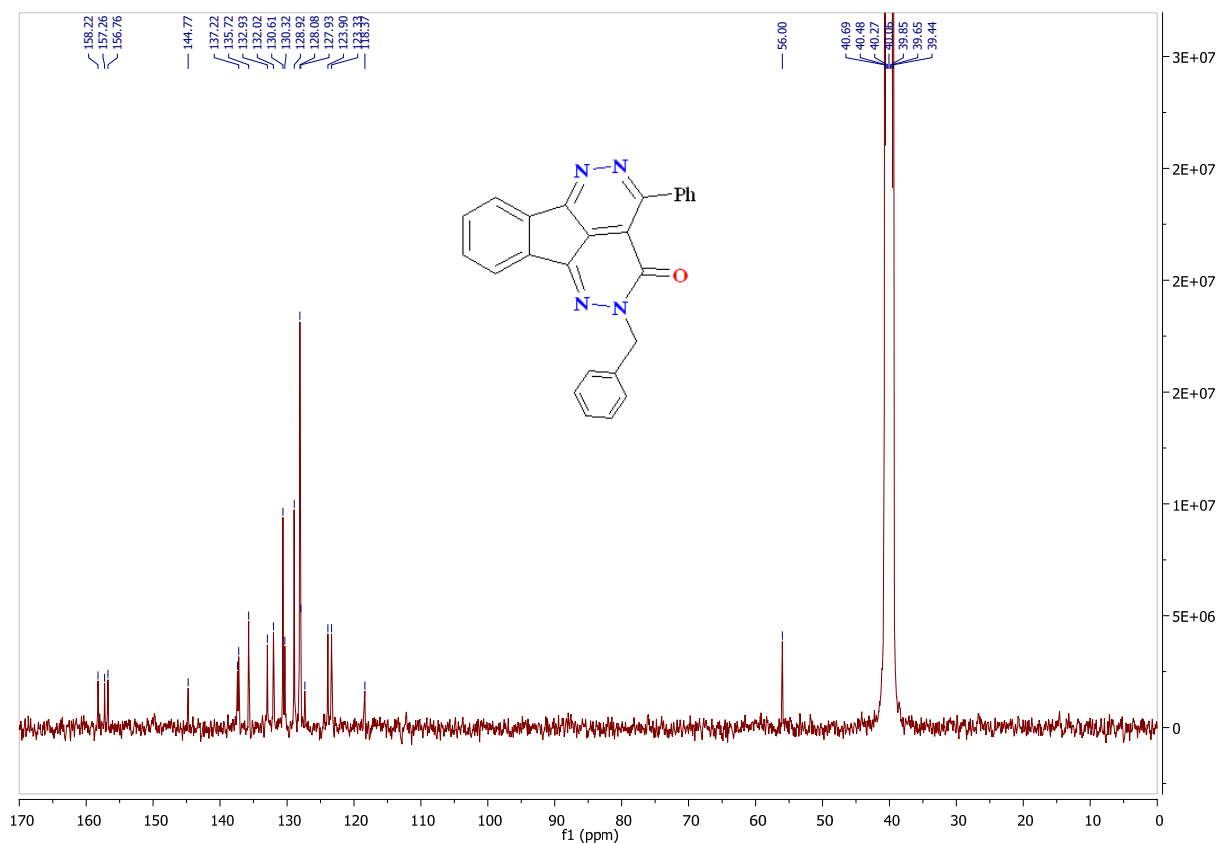Figure S8. <sup>13</sup>C NMR of **5**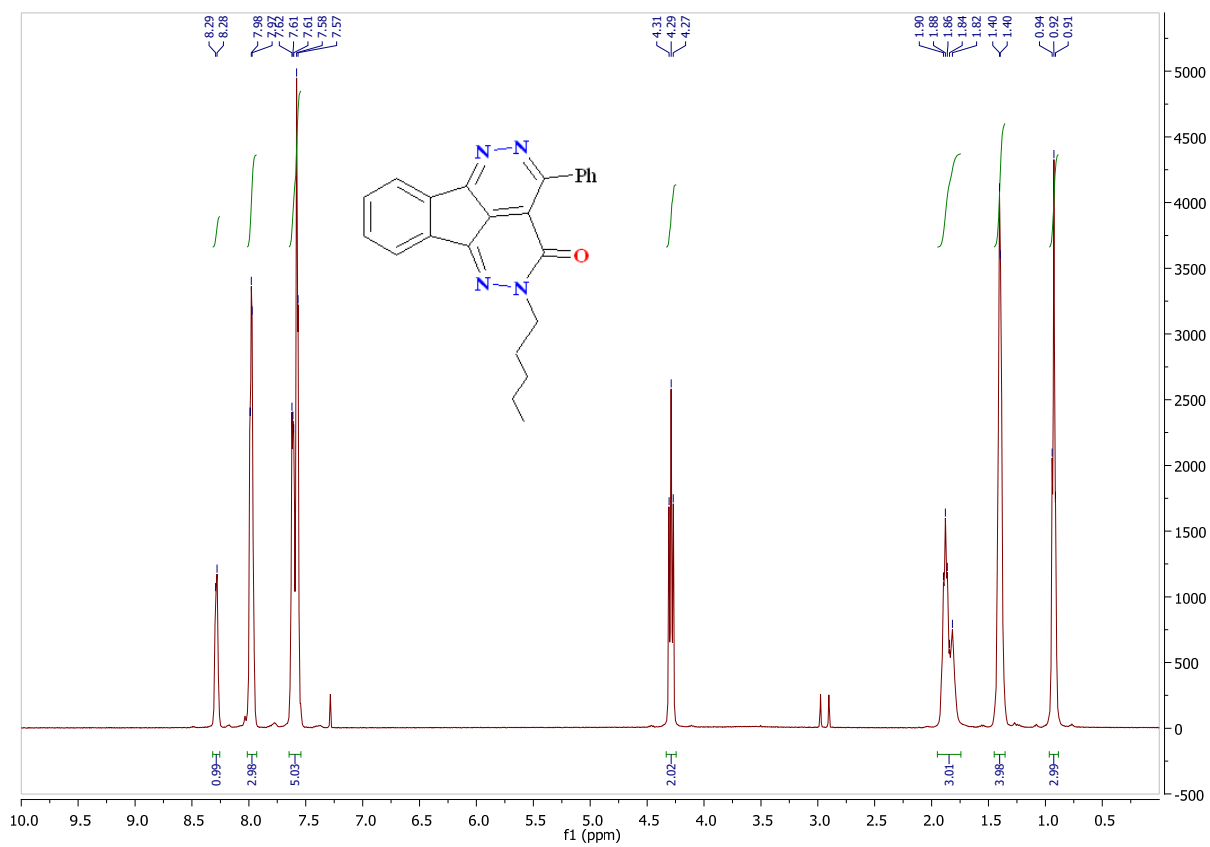Figure S9. <sup>1</sup>H NMR of **6**

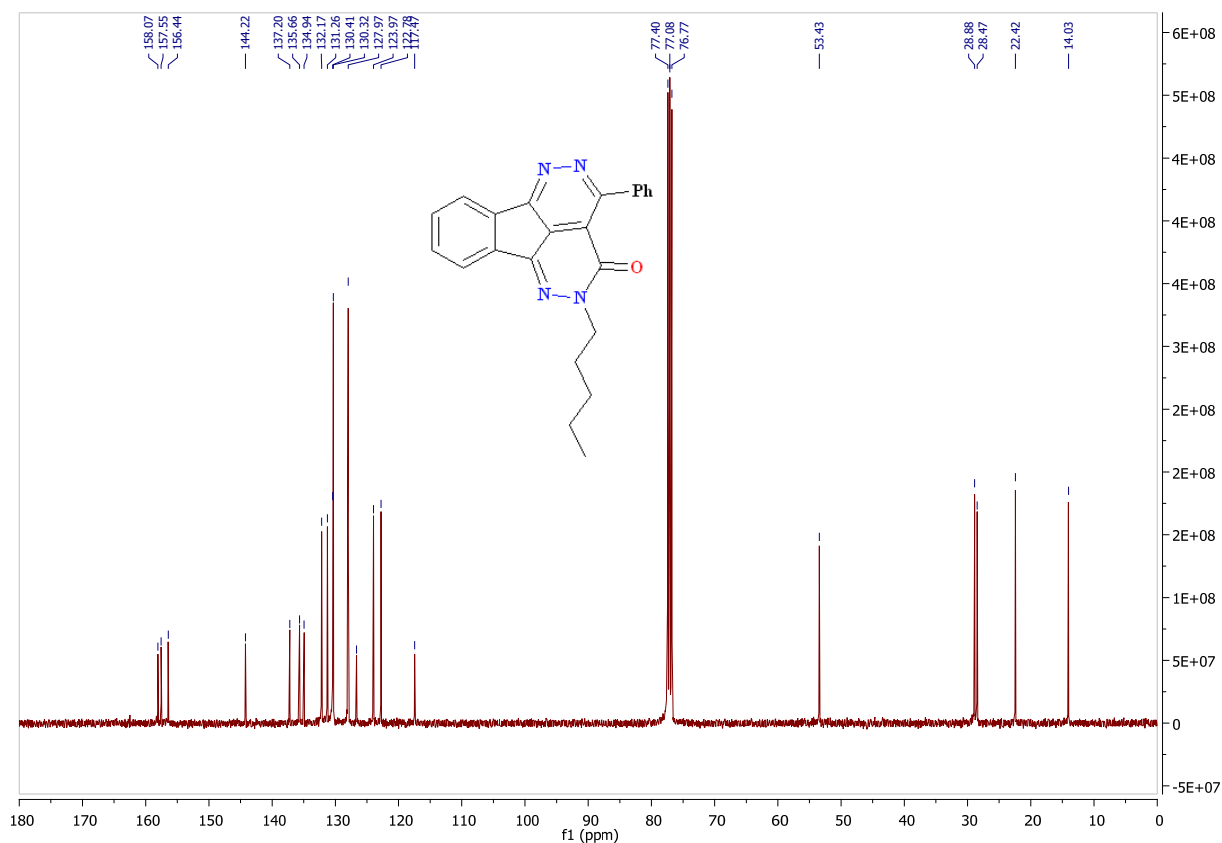Figure S10. <sup>13</sup>C NMR of 6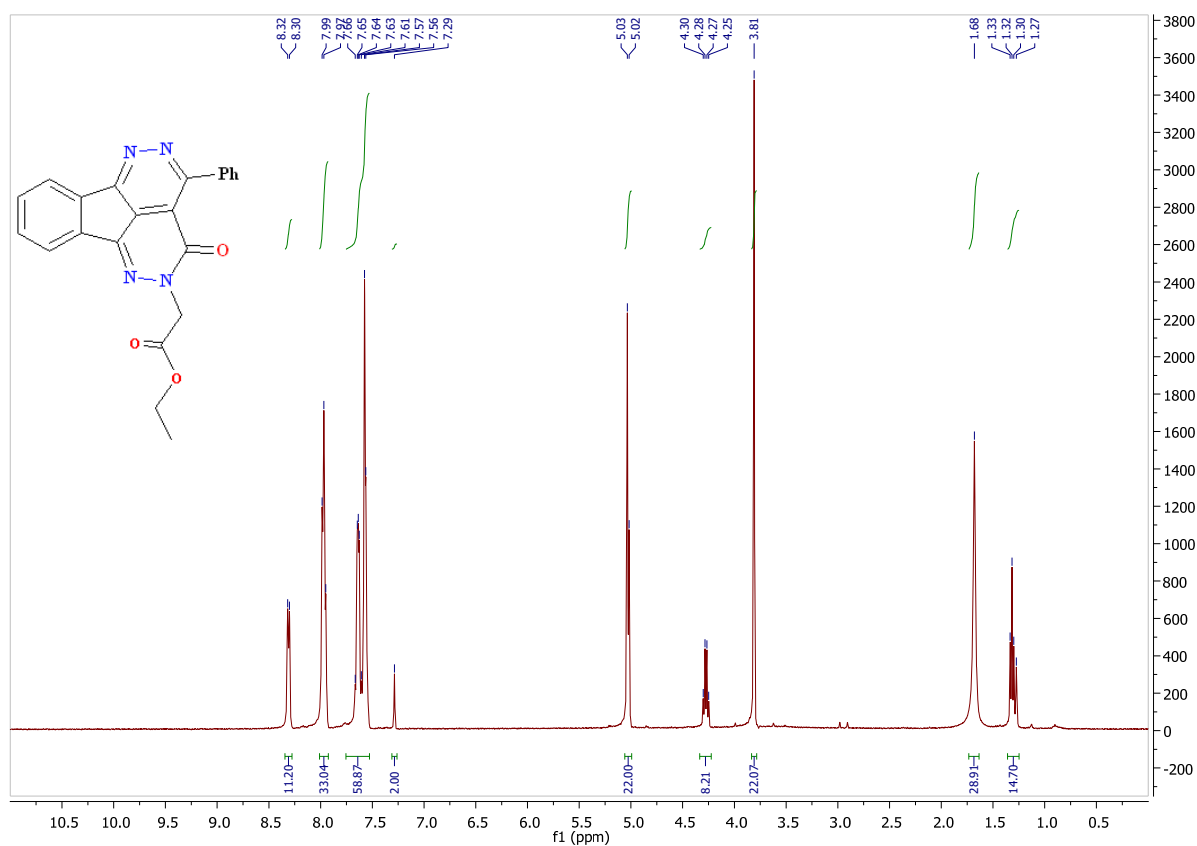Figure S11. <sup>1</sup>H NMR of 7

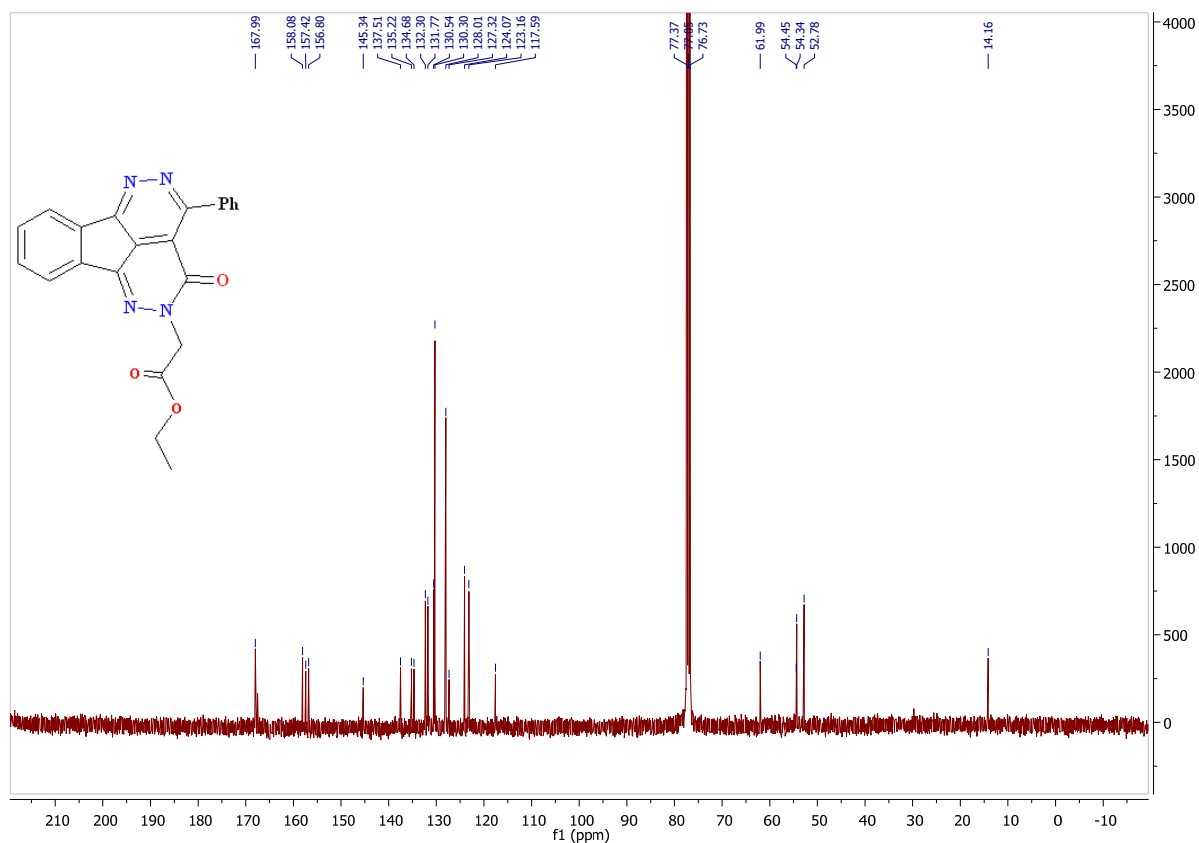Figure S12. <sup>13</sup>C NMR of 7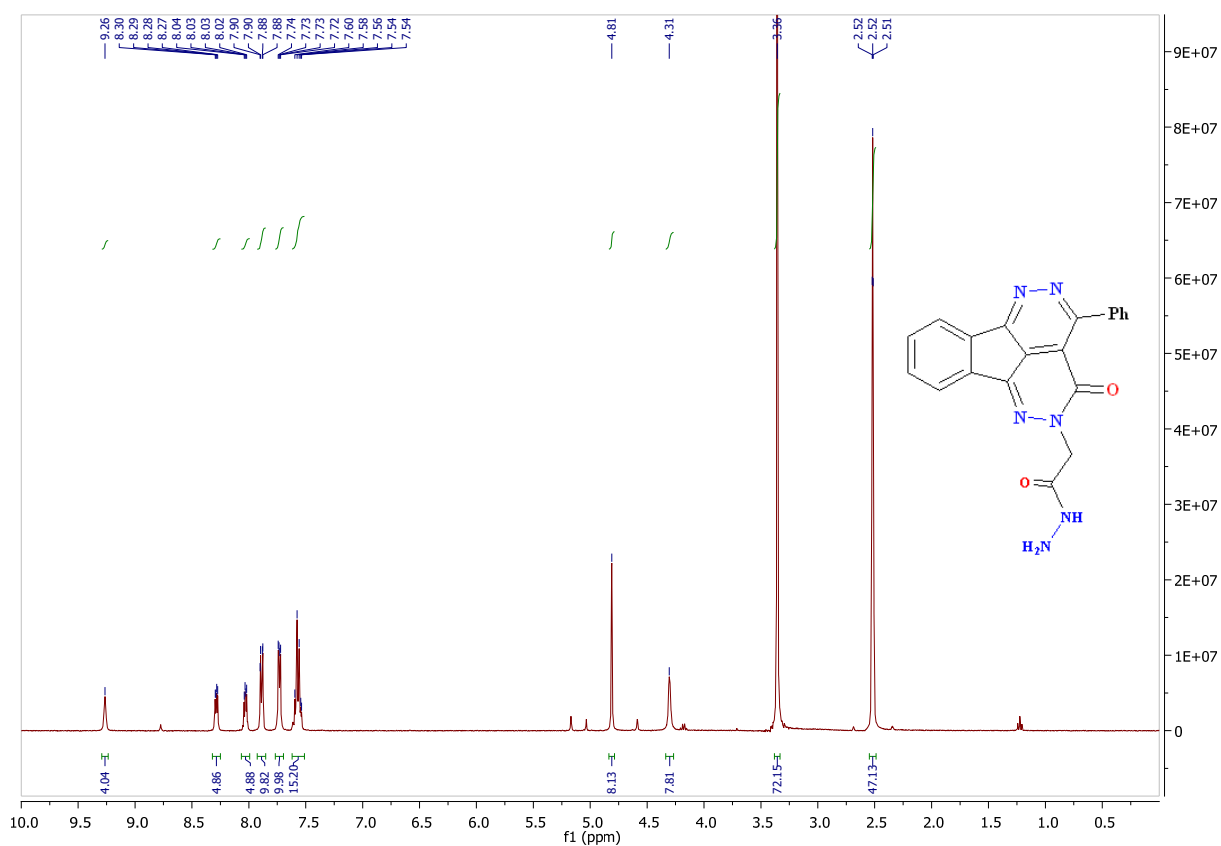Figure S13. <sup>1</sup>H NMR of 8



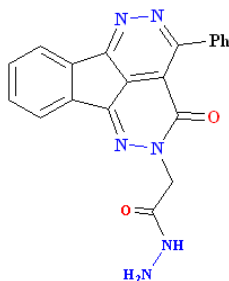

**Figure S14.**  $^{13}\text{C}$  NMR of **8**

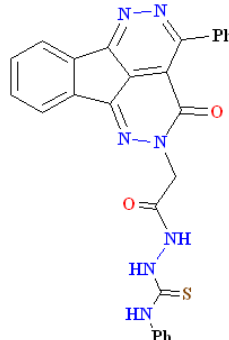

**Figure S15.**  $^1\text{H}$  NMR of **9**

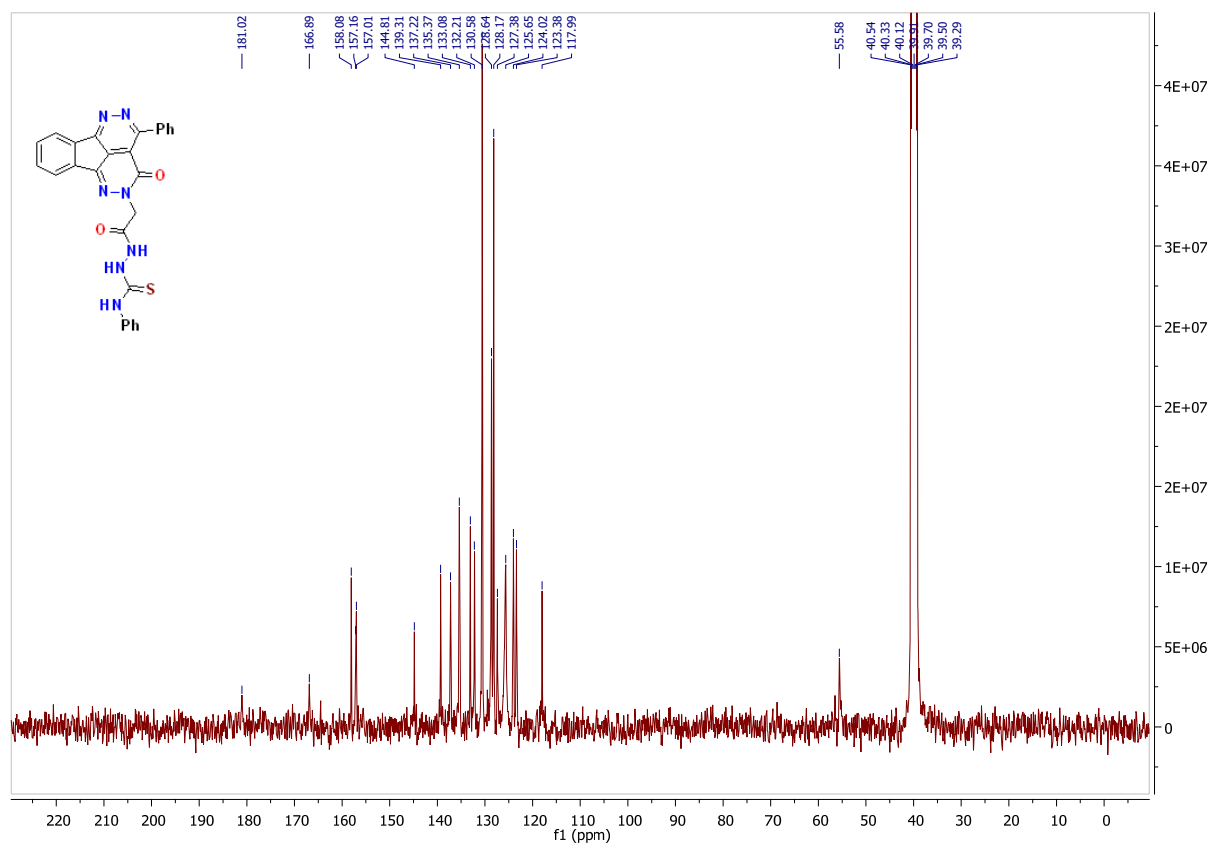

Figure S16. <sup>13</sup>C NMR of 9
